# Supplementary material for: Prevention and Management of Obesity in Children with Autism Spectrum Disorder Among Primary Care Pediatricians
Source: Springer Nature journal article supplement (doi:10.1007/s10803-018-3494-0), 2018-02-15
Supplement: MOESM1 [file 15469946]

**Appendix 1: Fictional Clinical Survey Vignettes**

***Child with Autism Spectrum Disorder:***

**Scenario:**

You are seeing a 12 year-old white male, Henry, in your clinic for well-child visit. Henry was diagnosed with autism spectrum disorder at age 2. He is minimally verbal and is currently in speech and occupational therapy. He sometimes displays his frustrations with self-injurious behaviors such as head-banging. He occasionally gets in trouble for hitting his siblings or peers at school but Mom has found using the tablet as a part of a behavior reward system has worked well. Mom shares with you that he is only getting about 5 hours of sleep per night and is interested in talking with you about possible medications to help his sleep. On review of his growth chart, you observe he is gaining in height appropriately but is in the 95th percentile for BMI.

**Scenario, continued**:

Six months later, Henry returns to your clinic with his Mom for the chief complaint of weight gain. On review of his growth chart, you note he has had a 10-pound weight gain since the last visit. Mom reports that he is very selective about his foods but likes to eat soft foods like rice, pasta, and French fries. He mostly drinks boxed juices and does not like milk or water. He does enjoy playing games on his tablet and Mom continues to find it very useful for behavior management. He spends about 3 hours a day watching his favorite cartoons. Mom thinks his weight gain is due to his diet and minimal physical activity but asks your advice on how to proceed.

***Child with Typical Development***

**Scenario:**

You are seeing a 12 year-old white male, Henry, in your clinic for well-child visit. His development is appropriate for age but he does have dyslexia that was diagnosed 2 years ago. He occasionally gets in trouble for hitting his siblings or his peers at school but Mom has found using the tablet as a part of a behavior reward system has worked well for her children. Mom shares with you that he is only getting about 5 hours of sleep per night and is interested in talking with you about possible methods to help him get to sleep at night. Upon review of his growth chart, you observe he is gaining in height appropriately but is in the 95th percentile for body mass index (BMI).

**Scenario, continued**:

Six months later, Henry returns to your clinic with his Mom for the chief complaint of weight gain. On review of his growth chart, you note he has had a 10-pound weight gain since the last visit. Mom reports that he is picky about his foods but likes to eat chicken nuggets, macaroni and cheese, and French fries and refuses to eat most vegetables. He mostly drinks boxed juices or milk and does not like water. He is often playing games on his tablet but Mom continues to find it very useful for behavior management. He spends about 3 hours a day watching his favorite cartoons. Mom thinks his weight gain is due to his diet and minimal physical activity but asks your advice on how to proceed.
